# Supplementary material for: The social and environmental complexities of extracting energy transition metals
Source: PubMed Central journal article supplement (PMC7519138; doi:10.1038/s41467-020-18661-9), 2020-09-24
Supplement: 41467_2020_18661_MOESM3_ESM.pdf [file 41467_2020_18661_MOESM3_ESM.pdf]

## **Description of Additional Supplementary Files**

File Name: Supplementary Data 1

Description: List of public datasets used with download links and descriptions
